# Supplementary material for: Enhanced thermoelectricity of three-dimensionally mesostructured BixSb2−xTe3nanoassemblies: from micro-scaled open gaps to isolated sealed mesopores
Source: Royal Society of Chemistry journal article supplement (doi:10.1039/c7nr00132k), 2017-01-01
Supplement: c7nr00132k1.pdf [file c7nr00132k1.pdf]

## Supplementary information

### Enhanced thermoelectricity of three-dimensionally mesostructured $\text{Bi}_x\text{Sb}_{2-x}\text{Te}_3$ nanoassemblies: from micro-scaled open gaps to isolated sealed mesopores

Tsung-Han Chen, Ping-Yu Lin, Hsiu-Cheng Chang, and Chun-Hua Chen\*  
*Department of Materials Science and Engineering, National Chiao Tung University,  
1001 Ta-Hsueh Rd., Hsin-Chu, 30010 Taiwan, ROC.*

\*Corresponding authors: Chun-Hua Chen, [chunhuachen@mail.nctu.edu.tw](mailto:chunhuachen@mail.nctu.edu.tw)

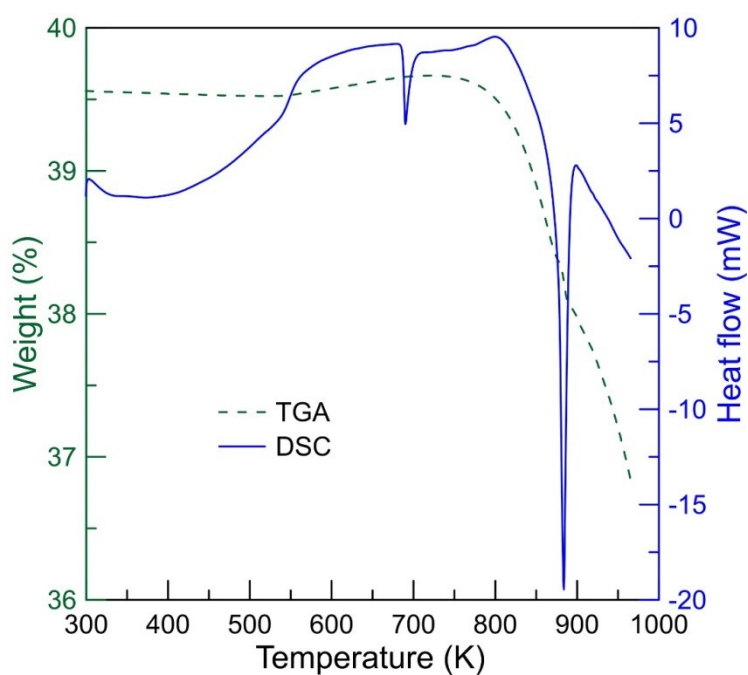

**Fig. S1** DSC and TGA characterizations of the raw  $\text{Bi}_{0.5}\text{Sb}_{1.5}\text{Te}_3$  powders.

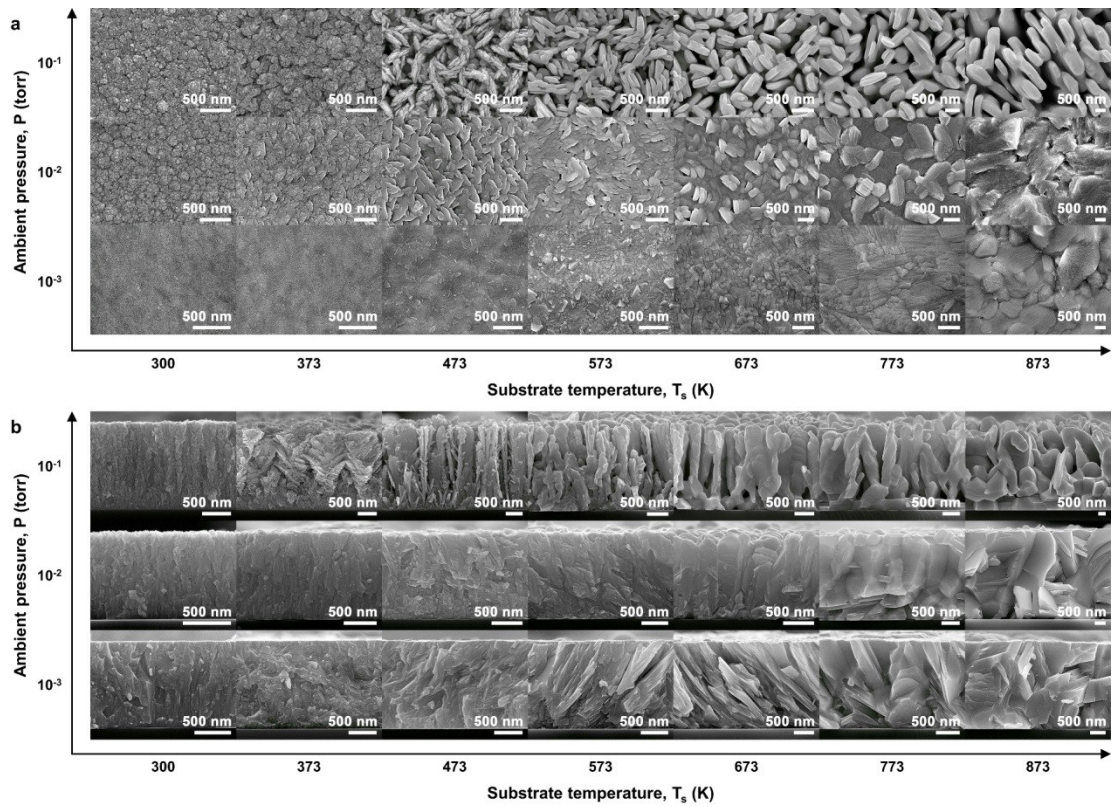

**Fig. S2** (a) top-view and (b) cross-sectional SEM images of the BST nanoassemblies grown at substrate temperatures ( $T_s$ ) ranging from 300 K to 873 K and ambient pressures ( $P$ ) ranging from  $10^{-1}$  torr to  $10^{-3}$  torr.
